# Supplementary material for: A UCN@mSiO2@cross-linked lipid with high steric stability as a NIR remote controlled-release nanocarrier for photodynamic therapy
Source: Royal Society of Chemistry journal article supplement (doi:10.1039/c5tb00240k), 2015-01-01
Supplement: c5tb00240k1.pdf [file c5tb00240k1.pdf]

## Supporting Information

### **UCN@mSiO<sub>2</sub>@cross-linked lipid with high steric stability as NIR remote controlled-release nanocarrier for photodynamic therapy**

Beibei Hou<sup>1†</sup>, Bin Zheng<sup>1†</sup>, Xiaoqun Gong<sup>1</sup>, Hanjie Wang<sup>1,\*</sup>, Sheng Wang<sup>1</sup>, Zhenyu Liao<sup>2</sup>, Xiaodong Li<sup>3</sup>, Xuening Zhang<sup>3</sup>, Jin Chang<sup>1,\*</sup>

1 School of Life Sciences, Tianjin University, Collaborative Innovation Center of Chemical Science and Engineering (Tianjin), 92 Weijin Road, Nankai District, Tianjin 300072, P.R. China

2 The National Center of Supervision and Inspection for Quality of Food, Tianjin Product Quality Inspection Technology Research Institute, Tianjin 300384, People's Republic of China.

3 The Second Hospital of Tianjin Medical University, Tianjin, 300211. China

†These authors contributed equally to this work.

---

\*Corresponding authors.

E-mail addresses: [wanghj@tju.edu.cn](mailto:wanghj@tju.edu.cn) (Hanjie Wang)

\*Corresponding authors.

E-mail addresses: [jinchang@tju.edu.cn](mailto:jinchang@tju.edu.cn) (Jin Chang)

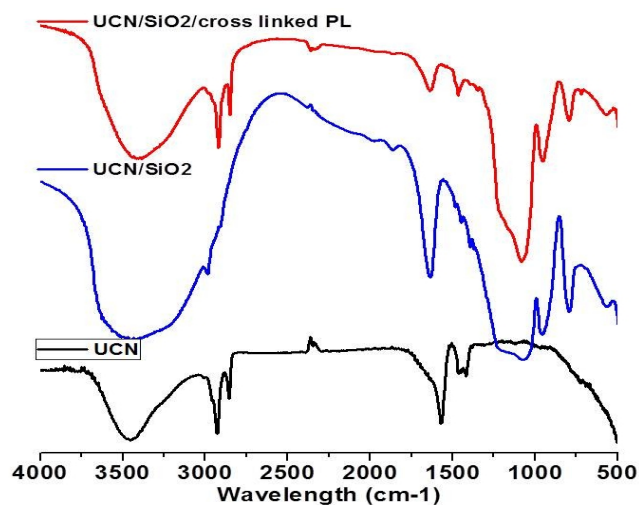

Figure S1: FTIR spectra of UCNs, UCN@SiO<sub>2</sub> nanocarrier and UCN@SiO<sub>2</sub>@cross-linked lipid nanocarrier.

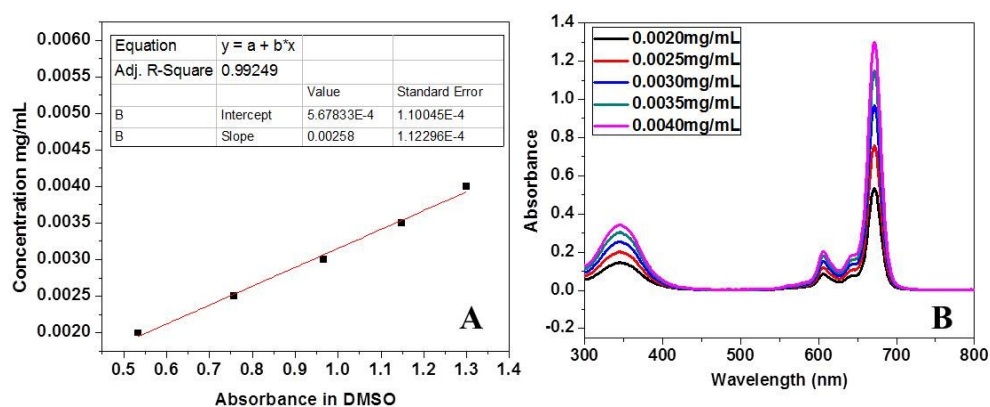

Figure S2: (A) The standard curve of ZnPc about the relationship between absorption value and the concentration. (B) UV-Vis spectra of ZnPc with various concentrations.

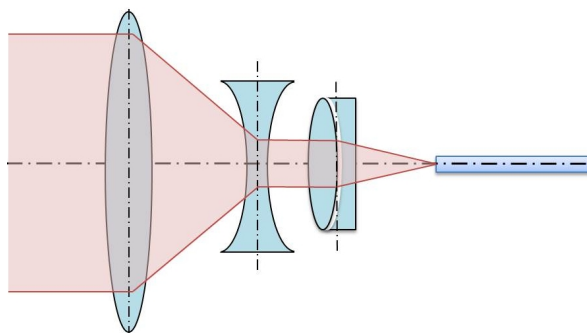

Figure S3: Schematic drawing about how to expand to beam. The optical fiber diameter is 0.2mm, optical fiber emission angle is  $11^\circ$  and the output diameter is 50mm.

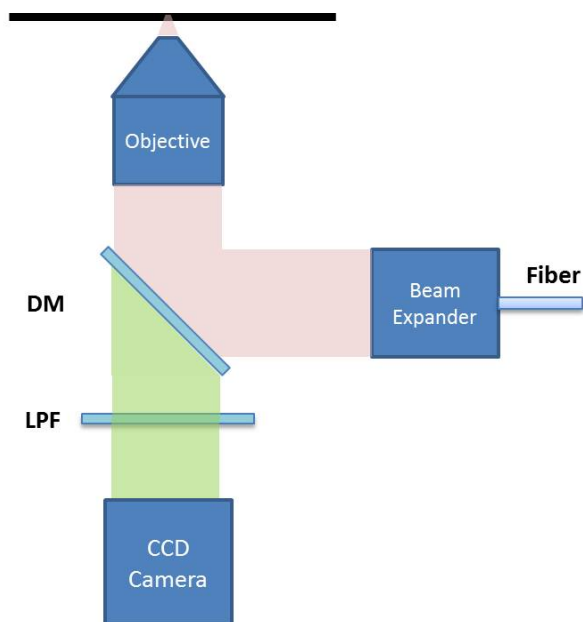

Figure S4: Schematic drawing about light path diagram of NIR on fluorescence microscopy.

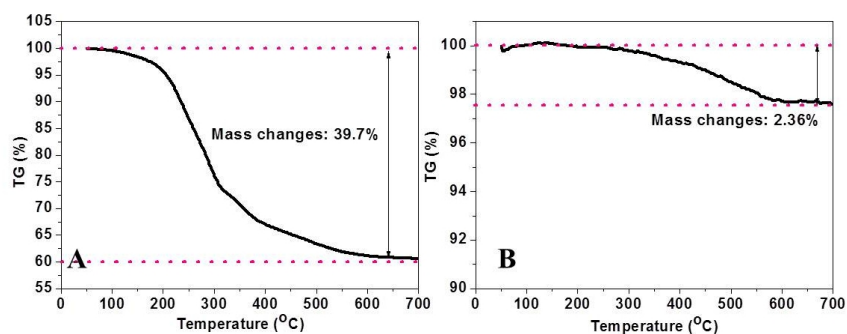

Figure S5: Thermogravimetric curve (TG) of (A) UCN@mSiO<sub>2</sub> containing CTAB template and (B) UCN@mSiO<sub>2</sub> nanoparticles after removing the CTAB template.

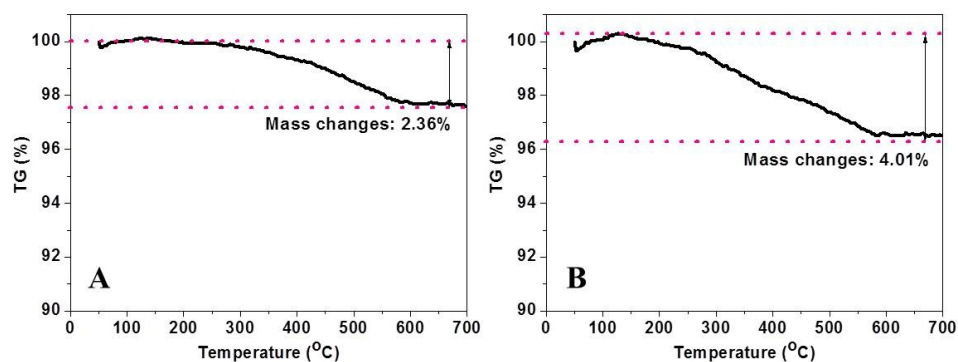

Figure S6: Thermogravimetric curve (TG) of (A) UCN@mSiO<sub>2</sub> nanoparticles after removing the CTAB template and (B) UCN@mSiO<sub>2</sub>@cross-linked PL nanoparticles.

Table S1: The particle size, zeta potential of UCNs, UCN@mSiO<sub>2</sub> nanocarrier, (UCN+ZnPc)@mSiO<sub>2</sub> nanocarrier and (UCN+ZnPc)@mSiO<sub>2</sub>@cross-linked lipid nanocarrier.

|                                                         | Particle size (nm) | Polydispersity index (PDI) | Zeta potential (mV) |
|---------------------------------------------------------|--------------------|----------------------------|---------------------|
| UCNs                                                    | 52.3               | 0.219                      | -10.0               |
| UCN/porous SiO <sub>2</sub>                             | 152                | 0.076                      | -26.1               |
| (UCN+ZnPc)/porous SiO <sub>2</sub>                      | 164.3              | 0.178                      | -28.4               |
| (UCN+ZnPc)/porous SiO <sub>2</sub><br>/ cross-linked PL | 221                | 0.233                      | +23.7               |
